# Supplementary material for: Evolution of bopA Gene in Burkholderia: A Case of Convergent Evolution as a Mechanism for Bacterial Autophagy Evasion
Source: Biomed Res Int. 2016 Nov 27;2016:6745028. doi: 10.1155/2016/6745028 (PMC5149610; doi:10.1155/2016/6745028)
Supplement: Supplementary file 1 — The GC and CAI values for the gene BopA and the genome that BopA locates, respectively. [file 6745028.f1.zip]

Archive with 2 entries (2 files):
- mat.6745028.v1.docx
- Table S2 accession numbers.docx
